# Supplementary material
Source: Elsevier journal article supplement (https://www.sciencedirect.com/science/article/pii/S0001731019303710)
Supplement: mmc1 [file S0001731019303710:mmc1.pdf]

### Anexo 1. Tabla de artículos excluidos

| ARTÍCULOS EXCLUIDOS                  | MOTIVOS                                                                                                                                 |
|--------------------------------------|-----------------------------------------------------------------------------------------------------------------------------------------|
| Dunn J, 2013 <sup>9</sup>            | Revisión narrativa.                                                                                                                     |
| Saunte DM, 2016 <sup>12</sup>        | Revisión narrativa.                                                                                                                     |
| Silva-Feistner M, 2015 <sup>16</sup> | Población escasa: 2 casos.<br><br>Estudio de la aplicación de terapia fotodinámica más apoyo nutricional.<br><br>Información narrativa. |
| Ingram JR, 2016 <sup>17</sup>        | Revisión narrativa.                                                                                                                     |
| Grimstad ø, 2016 <sup>18</sup>       | Revisión narrativa                                                                                                                      |
| Suárez MJ, 2016 <sup>19</sup>        | Aplicación del tratamiento (terapia fotodinámica) en otras enfermedades distintas de la enfermedad a estudio (hidradenitis supurativa)  |
| Nicholson CL, 2016 <sup>20</sup>     | Población escasa: 1 único caso.<br><br>Metodología no explícita. Información narrativa.                                                 |
| Chen W, 2016 <sup>21</sup>           | Artículo de opinión.                                                                                                                    |
| Gulliver W, 2016 <sup>22</sup>       | Información incluida en la revisión sistemática de Cochrane.                                                                            |
| Ingram JR, 2016 <sup>23</sup>        | Información incluida en la revisión sistemática de Cochrane.                                                                            |
| van Rappard DC, 2015 <sup>24</sup>   | Información incluida en la revisión sistemática de Cochrane. <sup>3</sup>                                                               |

|                                  |                                                                                       |
|----------------------------------|---------------------------------------------------------------------------------------|
| Mordon S, 2017 <sup>25</sup>     | Revisión narrativa.                                                                   |
| Zhang Y, 2018 <sup>26</sup>      | Población escasa: 1 caso.                                                             |
| Jourabchi N, 2018 <sup>27</sup>  | Población escasa: 1 caso.                                                             |
| Scuderi N, 2017 <sup>28</sup>    | Revisión narrativa.                                                                   |
| Emtestam L, 2017 <sup>29</sup>   | Se trata de una carta de respuesta a la revisión narrativa de Grimstad. <sup>18</sup> |
| Ingram JR, 2017 <sup>30</sup>    | Resumen de la actualización de la Revisión sistemática de Ingram 2015. <sup>3</sup>   |
| Levoska M, 2017 <sup>31</sup>    | Revisión narrativa                                                                    |
| Hamzavi IH, 2015 <sup>32</sup>   | Revisión narrativa                                                                    |
| Marasca C, 2018 <sup>33</sup>    | Revisión narrativa                                                                    |
| Zhang L, 2016 <sup>34</sup>      | Población escasa: 4 casos                                                             |
| Mikkelsen PR, 2015 <sup>35</sup> | Serie de casos retrospectivo que no responde a la pregunta de investigación.          |
